# Supplementary material for: Trace Metals Distribution in Sulfide Minerals of the Ultramafic-Hosted Hydrothermal Systems: Example from the Kairei Vent Field, Central Indian Ridge
Source: Preprints.org preprint supplement (doi:10.20944/preprints201809.0064.v1), 2018-09-04
Supplement: Supplementary file 1 [file supplementary]

## Sheet: Sheet1
supplementary table 2 Trace and main element concentrations (ppm) of the analyzed sulfides at the KHF obtained from LA-ICP-MS
Sample	phase	Mg	Si	V	Mn	Fe	Co	Ni	Cu	Zn	Ga	Ge	As	Se	Mo	Ag	Cd	In	Sn	Sb	Te	Ba	Au	Tl	Pb	Bi	U
17-9 spot1	collorm banded py-III	53.1309	457.432	4.77538	119.99	543159	221.577	85.2425	3.25065	2443.01	b.d.l.	b.d.l.	65.9354	2.91646	87.5214	0.0933479	7.14312	b.d.l.	0.364478	0.877095	0.770774	b.d.l.	0.227192	46.5332	248.502	b.d.l.	0.750744
RSD%		2.41065	10.9111	5.19634	2.16927	4.88902	4.41377	4.40373	14.9474	4.48215	---	---	3.71502	71.864	4.30413	47.8804	9.65222	---	23.7196	12.3754	75.8206	---	20.3744	3.1919	2.58495	---	5.55552
MDL		0.0634224	4.80958	0.0065267	0.0155485	1.89421	0.0171975	0.105116	0.0428144	0.39177	0.0061628	0.0343407	0.0456004	0.115166	0.0419932	0.0509116	0.0230996	9.25852e-05	0.00850189	0.00601295	1.13395	0.0161774	0.00138422	0.00127115	0.00670897	0.00328432	0.00029668
17-9 spot2	sub-enhedral py-II	b.d.l.	116.099	b.d.l.	299.265	535363	71.7237	b.d.l.	0.3978	29.4169	b.d.l.	2.45089	42.3898	1.82269	0.430138	0.896379	0.666233	b.d.l.	b.d.l.	b.d.l.	0.950983	b.d.l.	1.92579	55.9606	4.14787	b.d.l.	0.0173518
RSD%		---	39.2179	---	2.26591	4.79939	2.53777	---	70.2688	10.3559	---	41.8157	6.28513	74.8077	67.1574	12.1547	31.1351	---	---	---	62.8363	---	6.67095	2.7059	4.99186	---	21.0295
MDL		n.c.	6.15024	0.00308865	0.0155328	1.87994	0.0176032	0.0392882	n.c.	n.c.	0.0448736	0.0728994	0.0454413	0.316361	1.95452	0.00770813	0.0317478	0.00315127	0.0101039	0.00560822	0.226599	n.c.	0.0013313	0.00128608	0.00687054	0.014409	0.000286692
17-9 spot3	collorm banded py-III	127.181	170564	3.76204	299.205	509051	1515.96	46.092	158.868	11411	5.01883	10.6645	2261.71	b.d.l.	198.761	67.7292	37.9214	b.d.l.	14.3211	12.2238	b.d.l.	b.d.l.	2.08481	3.71532	69.2874	b.d.l.	3.02115
RSD%		5.79979	4.14971	8.37676	4.33151	5.14812	3.46383	7.41021	3.89825	10.3077	15.7563	24.2259	3.74375	---	4.79214	3.76362	13.6458	---	16.186	6.62922	---	---	11.044	5.41538	5.03656	---	6.69412
MDL		0.174375	13.8909	0.0189311	0.0447579	5.52219	0.0491404	0.351322	0.100568	1.12453	0.0236123	0.235668	0.131171	n.c.	0.117376	0.0210494	0.0696661	n.c.	0.0211728	0.0171244	0.624619	0.0256534	0.00338407	0.00370784	0.0187587	0.00809572	0.000799941
17-9 spot4	sph	b.d.l.	277.943	b.d.l.	56.9617	35609.6	225.82	b.d.l.	4322.56	724895	65.8871	266.119	427.053	20.8539	b.d.l.	622.432	702.986	0.318238	116.01	34.2894	b.d.l.	b.d.l.	0.224208	0.127337	3540.2	0.0855242	b.d.l.
RSD%		---	16.8563	---	4.5229	5.71787	3.67956	---	2.19774	3.66047	3.5013	3.15876	3.83756	19.6474	---	5.3149	4.68773	14.6562	8.96012	4.78336	---	---	15.9745	15.4127	4.49827	27.5391	---
MDL		0.346971	4.93258	0.00432494	0.0147236	1.76382	0.016556	n.c.	0.0349417	0.394086	0.00804493	0.0798288	0.0439005	0.128934	n.c.	0.00714682	0.0212609	0.00207717	0.00688627	0.00586458	0.295513	0.00783225	0.00133915	0.00152881	0.00645903	0.00150437	n.c.
17-9 spot5	sub-enhedral py-II	26.881	22856.6	5.74106	431.544	537569	187.662	3.596	76.6514	1639.68	1.1415	5.63191	330.3	2.64235	114.345	8.70201	5.99041	0.0405465	1.67643	2.35196	b.d.l.	b.d.l.	0.358665	2.44328	18.1481	b.d.l.	1.59912
RSD%		7.98673	13.9114	4.05968	2.55389	5.04993	7.70187	33.3888	8.29905	5.31038	18.8893	25.8929	8.01652	74.9692	5.66795	8.36664	12.4635	66.9889	13.792	20.9843	---	---	19.2888	6.99752	5.53359	---	6.21725
MDL		0.0982702	5.58712	0.0100543	0.0238458	2.94584	0.0230117	1.19535	0.0500729	0.595895	0.0120538	0.156453	0.0594686	0.373066	0.0590543	0.0100077	0.0369353	0.00803053	0.0116631	0.00687608	n.c.	0.00536366	0.00200878	0.00178765	0.00966812	0.00132101	0.000420662
17-9 spot6	sph, mixed with cpy	b.d.l.	405.89	b.d.l.	184.93	157079	459.092	1.29218	13593.3	566123	174.592	78.7045	66.1618	20.3894	b.d.l.	199.944	1801.28	1.74047	555.995	65.864	b.d.l.	b.d.l.	0.296248	0.0400046	1094.88	b.d.l.	b.d.l.
RSD%		---	14.6796	---	3.07777	5.06036	3.70984	75.2605	9.8063	4.92604	4.59714	6.10758	5.16768	26.6653	---	4.76608	4.69332	9.6342	9.53349	5.12399	---	---	23.3227	42.3466	5.36626	---	---
MDL		0.082094	6.11138	5.8657e-05	0.0205496	2.48569	0.0226787	n.c.	0.0419292	0.500618	0.0103166	0.102993	0.0596522	0.159501	0.125262	0.00998972	0.0288624	0.00304014	0.00928053	0.00797793	0.0781482	0.0120154	0.00187641	0.00316953	0.00911768	0.00124728	n.c.
17-9 spot7	sub-enhedral py-II	36.8997	b.d.l.	3.05318	1049.36	526789	28.9144	1.24638	11.485	1313.77	0.111086	1.73492	27.2515	1.16889	62.2137	0.528977	3.34236	b.d.l.	0.112226	0.511371	b.d.l.	b.d.l.	0.133961	2.4281	21.7472	0.021204	0.745494
RSD%		3.6366	---	6.54977	1.93024	5.31702	5.29889	78.5357	6.28584	5.76376	77.0676	61.0785	5.74427	74.8964	4.83163	19.6957	17.7004	---	62.557	18.6825	---	---	34.1004	6.25397	4.41911	86.5	5.11398
MDL		0.0675196	4.99653	0.00696263	0.0174559	2.08232	0.0192315	n.c.	0.0458764	0.452201	0.0104409	0.0882398	0.0510734	n.c.	0.0459404	0.00968691	0.0237188	0.00526024	0.00782937	0.00731044	0.190293	0.00901589	0.00133153	0.00140512	0.00752393	0.00219751	0.000327779
17-9 spot8	collorm banded py-III	21.7974	b.d.l.	3.44562	146.727	546613	86.982	5.80801	1.60913	610.466	b.d.l.	b.d.l.	22.0676	4.85418	75.3234	b.d.l.	1.9638	b.d.l.	b.d.l.	0.602926	b.d.l.	b.d.l.	0.0642142	14.6309	18.3505	b.d.l.	0.190661
RSD%		5.23255	---	6.14818	2.01873	4.94604	2.21833	17.5101	30.1666	5.05094	---	---	7.96458	41.3081	4.45581	---	24.97	---	---	16.5646	---	---	42.612	3.25497	3.13481	---	9.05202
MDL		0.0676949	9.53953	0.00699574	0.0168741	2.0625	0.0190016	0.169445	0.0544115	0.459584	0.00584458	0.0767627	0.0487273	0.185938	0.0453574	n.c.	0.0304009	0.00188216	n.c.	0.00690752	0.0398532	0.00467147	0.00148183	0.00139081	0.00755325	0.0157868	0.000320864
17-9B spot1	sph	b.d.l.	381.563	0.115682	84.306	65045.9	488.285	b.d.l.	3000.91	709446	132.12	395.963	592.208	22.2544	b.d.l.	51.5536	1592.19	0.56299	179.508	111.117	b.d.l.	b.d.l.	b.d.l.	b.d.l.	477.028	0.025645	b.d.l.
RSD%		---	10.8799	39.5162	1.79196	3.38372	2.61295	---	1.96918	3.25543	2.34891	3.4165	2.127	22.9197	---	2.71265	3.3292	9.02977	3.25713	2.40458	---	---	---	---	1.84829	53.1328	---
MDL		0.0214654	4.56792	0.00868278	0.0162377	1.5721	0.015276	0.871633	0.0580639	0.474283	0.00768678	0.103324	0.0783015	0.153955	0.00921216	0.00524666	0.0273617	0.0025044	0.00672942	0.00636938	0.0675826	0.01538	0.000595886	n.c.	0.00643838	0.00182695	n.c.
17-9B spot2	sph	b.d.l.	373.805	b.d.l.	99.8229	82795.4	584.767	1.44155	4138.97	687485	123.773	256.658	375.122	22.5066	b.d.l.	266.257	1272.32	0.884103	263.603	68.512	b.d.l.	b.d.l.	0.0549444	0.0213582	1401.9	0.0483675	0.000839806
RSD%		---	13.5084	---	1.96918	3.27789	2.06284	88.7612	2.17448	3.45509	2.78409	4.35553	3.76978	25.2257	---	2.55771	3.61055	8.53482	3.54045	2.19431	---	---	40.3343	60.2918	2.04409	43.1026	89.5275
MDL		0.0516237	4.01028	0.00737675	0.016713	1.6326	0.015769	0.130344	0.0597058	0.488296	0.00793133	0.108012	0.0807658	0.141051	0.00291117	0.00533957	0.0283946	0.00259091	0.00683432	0.00666053	n.c.	0.0200909	0.00118957	0.00103731	0.0066816	0.00158752	0.000474264
17-9B spot3	sph	b.d.l.	383.888	b.d.l.	64.6388	61756.9	456.173	b.d.l.	3021.42	712538	103.793	112.28	274.623	26.9755	b.d.l.	271.996	1104	0.765206	224.035	57.9146	0.645741	b.d.l.	0.0772634	b.d.l.	814.335	0.0242989	b.d.l.
RSD%		---	10.7143	---	1.73138	3.05918	1.61072	---	1.87685	3.25227	2.29551	3.72571	2.40003	25.1042	---	2.85385	3.32538	6.9607	3.05676	1.95677	84.6039	---	27.1634	---	4.57134	66.0976	---
MDL		0.0385969	5.00755	0.00344738	0.0163204	1.62012	0.0156785	0.0238836	0.0584183	0.481997	0.0077798	0.10551	0.0789053	0.132858	0.0161149	0.00510791	0.027988	0.00268803	0.00676262	0.00647712	0.0959889	n.c.	0.00103034	0.000513923	0.0061428	0.00123514	n.c.
17-9B spot4	sph	b.d.l.	358.103	b.d.l.	89.5543	62221.6	431.523	b.d.l.	3044.87	706827	115.753	285.153	404.744	26.4709	b.d.l.	63.1021	1430.56	0.676634	219.15	79.7703	b.d.l.	b.d.l.	0.0288148	b.d.l.	634.517	0.0532223	b.d.l.
RSD%		---	13.8193	---	2.66304	4.21315	2.8623	---	2.67552	3.95227	3.97365	3.8935	3.30139	21.0608	---	3.29933	3.91172	8.81314	3.9763	3.28969	---	---	61.2311	---	3.31353	25.9927	---
MDL		0.00630387	4.17257	n.c.	0.0159936	1.54891	0.0149032	0.089096	0.0570805	0.465666	0.00761474	0.10316	0.0768591	0.132623	n.c.	0.00507501	0.0273074	0.00264353	0.00661171	0.00645969	n.c.	0.00767347	0.000989422	0.000917192	0.00637473	0.00174687	n.c.
17-9B spot5	sph	2.58985	309.319	0.0638625	86.2772	53313	233.464	b.d.l.	6282.54	707741	90.2275	181.695	210.49	26.2638	b.d.l.	1004.59	1076.94	0.666385	189.296	53.521	b.d.l.	b.d.l.	0.473651	0.438638	6396.3	0.0962564	b.d.l.
RSD%		16.8684	12.1308	90.7223	2.96135	3.54874	2.2301	---	3.37478	4.02779	3.99905	4.21841	3.50006	20.1851	---	3.37624	4.16314	7.512	3.67561	2.42806	---	---	15.6725	19.3853	4.64739	26.2098	---
MDL		0.0715684	4.08281	0.00323793	0.0153277	1.50262	0.0144175	0.041116	0.0545473	0.447083	0.00733772	0.0984563	0.0722709	0.142287	0.0278094	0.00490596	0.0262573	0.00253844	0.00636974	0.00615777	0.832281	0.0092218	0.00105907	0.000774028	0.00608982	0.00134544	n.c.
17-9B spot6	sph	b.d.l.	252.287	0.0710388	69.9008	48037.3	289.586	b.d.l.	6150.89	714156	121.289	264.124	428.922	22.329	0.379726	289.192	1294.25	0.797458	263.025	74.94	b.d.l.	b.d.l.	0.0963763	0.026308	2113.46	0.158288	b.d.l.
RSD%		---	16.1005	72.501	2.718	3.25457	2.79998	---	2.6296	3.90786	2.85132	4.40518	3.23744	20.6679	51.0447	3.04216	4.17633	7.68557	3.87722	2.82389	---	---	22.7821	50.6618	4.14129	19.3329	---
MDL		0.0284139	6.04535	0.00856784	0.0160854	1.58511	0.0151004	n.c.	0.0564455	0.468746	0.00742449	0.0998303	0.0764147	0.168641	0.3513	0.0050325	0.0267683	0.00245269	0.00642208	0.00625965	0.489745	0.01818	0.00131404	0.000880849	0.00608259	0.00132625	0.00023356
17-9B spot7	sph	b.d.l.	430.723	b.d.l.	108.975	132712	1150.43	b.d.l.	9301.62	623220	164.727	83.9819	119.087	25.9202	b.d.l.	137.712	1950.96	1.47667	407.993	89.094	0.891493	b.d.l.	b.d.l.	b.d.l.	419.858	0.0656566	b.d.l.
RSD%		---	11.1897	---	3.55125	4.23068	3.32342	---	3.34934	4.41365	3.82242	5.84325	5.04881	21.9649	---	3.62769	4.33529	6.99445	4.34383	3.83848	87.1724	---	---	---	4.03525	29.797	---
MDL		n.c.	6.3349	0.00597021	0.0197295	1.93158	0.0187236	0.0771104	0.0697966	0.576501	0.00922209	0.129364	0.0916054	0.173315	1.05314	0.0062383	0.0331276	0.00310418	0.00802283	0.00775056	0.0708211	0.00370894	0.000116578	n.c.	0.00768696	0.00169733	n.c.
17-9B spot8	sph	b.d.l.	431.476	b.d.l.	76.9689	75663.8	595.181	b.d.l.	8777.14	691462	202.331	159.271	222.98	32.6359	b.d.l.	132.42	2100.49	1.55291	441.97	100.782	0.531818	b.d.l.	0.0629177	0.0486345	703.408	0.0546069	b.d.l.
RSD%		---	9.07269	---	2.63015	3.29477	2.39337	---	2.90144	4.5031	4.67734	5.12803	3.45592	17.9725	---	3.21556	4.41334	6.70017	3.88607	3.34086	87.9553	---	31.3358	38.0186	5.9628	43.3999	---
MDL		0.0105515	5.11869	0.00432979	0.0167446	1.64133	0.0157245	0.014389	0.0594726	0.484358	0.00785862	0.106113	0.0805043	0.16351	0.0240284	0.00527935	0.0284382	0.00274412	0.00689538	0.00655725	n.c.	0.00566588	0.00114979	0.000888768	0.00641943	0.00116439	0.000292884
17-9C spot1	collorm banded py-III	27.2982	74.5565	3.67495	171.878	557350	61.8397	7.75958	5.10404	565.704	b.d.l.	b.d.l.	26.7168	2.82078	56.1449	b.d.l.	3.25524	b.d.l.	0.0782958	0.486465	b.d.l.	b.d.l.	0.108414	14.806	16.9227	0.0288226	0.157534
RSD%		3.42373	68.9445	4.64569	1.98685	3.99683	3.1603	21.7122	15.712	3.37619	---	---	6.11853	56.3458	3.98952	---	18.3295	---	97.6429	21.212	---	---	28.6261	4.32676	4.28933	71.991	7.1097
MDL		0.0686365	4.43348	0.0073525	0.01843	2.01046	0.0193763	0.205102	0.0759265	0.148668	0.0135177	0.0395484	0.102194	0.489691	0.0290429	n.c.	0.0297767	0.0137085	0.00543414	0.00718054	n.c.	0.0163888	0.00148502	0.00144093	0.00554285	0.0123286	0.00032889
17-9C spot2	collorm banded py-III	70.0217	80962.1	6.98732	657.223	499600	871.557	22.0767	104.189	2574.54	b.d.l.	3.84602	1320.29	b.d.l.	160.371	60.9587	7.99978	0.0494811	0.451664	6.63141	b.d.l.	0.575511	0.869733	2.76903	32.3899	b.d.l.	1.4241
RSD%		3.68477	2.60797	5.70939	2.64747	4.56904	2.88087	12.1522	4.00093	4.11435	---	54.3053	3.27894	---	4.29586	2.53255	14.5826	79.3207	32.572	6.7684	---	49.3617	16.1352	8.11701	4.22126	---	4.72813
MDL		0.118662	9.63873	0.0127674	0.0311931	3.41723	0.0322408	0.319476	0.121437	0.251499	n.c.	0.253317	0.176207	0.185267	0.049837	0.0100772	0.0580552	0.0168931	0.0139443	0.0123293	0.0940309	0.0312982	0.00238281	0.00234389	0.00953639	n.c.	0.00054217
17-9C spot3	sub-enhedral py-II	26.2837	8784.73	4.42168	346.459	544617	524.573	b.d.l.	61.0397	662.463	b.d.l.	b.d.l.	837.265	3.92447	84.1358	43.5702	0.998162	b.d.l.	1.00305	3.43932	b.d.l.	b.d.l.	33.6535	33.2528	110.053	b.d.l.	0.293691
RSD%		6.52941	7.33418	5.07323	3.32681	5.03672	2.91859	---	3.54089	5.60326	---	---	4.20233	49.924	4.68288	9.19899	49.5328	---	14.5668	7.36241	---	---	27.0894	3.4491	3.60069	---	15.7906
MDL		0.0953341	7.83695	0.0105428	0.0263342	2.85005	0.0271036	0.0963754	0.104261	0.210552	0.00779723	0.134136	0.147446	0.640849	0.0417181	0.00832379	0.0338325	0.000890042	0.0100329	0.0103029	0.072829	n.c.	0.00197117	0.00198742	0.00786017	0.00553254	0.000474439
17-9C spot4	sub-enhedral py-II	30.8329	5615.1	0.460497	117.863	536679	536.092	b.d.l.	75.1996	591.592	0.112234	b.d.l.	260.505	b.d.l.	5.80931	19.2708	2.23295	b.d.l.	0.547434	1.9871	1.16427	0.307893	0.180361	65.1955	49.0185	b.d.l.	1.53358
RSD%		6.67088	4.56246	22.7957	2.80317	4.69358	2.6856	---	4.11176	4.54898	73.702	---	3.16161	---	10.5906	4.17555	25.0694	---	22.3978	9.77351	65.3066	57.0998	26.128	3.56341	4.12581	---	14.4217
MDL		0.0752545	6.38446	0.00828229	0.0209315	2.25767	0.0216795	0.141964	0.0797499	0.164538	0.022249	0.284127	0.119028	n.c.	0.0341652	0.00655909	0.0298497	0.00168431	0.00709817	0.00809489	0.260044	0.0176524	0.00176917	0.00159542	0.00618564	0.00964554	0.000372288
17-9C spot5	early fine grain py-I	23.0343	9213.42	1.23699	300.957	564622	505.52	2.93867	120.463	909.619	0.475922	4.30879	745.789	2.64937	35.6721	38.1813	2.65945	b.d.l.	1.19851	1.85866	b.d.l.	0.151978	1.67475	13.8068	69.6592	0.0495842	0.402584
RSD%		7.95958	12.8514	9.5803	3.54373	4.38666	6.01481	59.4149	7.69835	28.3497	44.2672	32.8714	5.14364	74.7354	5.86487	4.14493	59.7315	---	35.4695	12.0312	---	67.5812	9.21475	3.18594	4.01339	36.2144	4.93358
MDL		0.0698132	5.18387	0.00837704	0.0216877	2.31736	0.0207542	0.649163	0.0759135	0.110165	0.00683295	0.192765	0.112595	0.353241	0.0324465	0.00652626	0.0182305	0.00259762	0.00503098	0.00686395	0.125349	0.072787	0.00167728	0.00158896	0.00600903	0.00644957	0.000359845
17-9C spot6	early fine grain py-I	10.78	5608.36	3.08161	239.049	522752	458.063	b.d.l.	352.407	12869.9	3.10534	8.80043	379.042	10.0005	54.8271	34.1367	26.4296	b.d.l.	6.45469	3.28958	b.d.l.	b.d.l.	4.68967	17.9233	318.71	b.d.l.	0.387395
RSD%		9.82854	5.18798	6.86633	4.08266	5.03593	4.39446	---	6.39616	6.74038	8.94306	21.6362	4.98426	24.8353	6.58317	4.60184	11.1608	---	7.33515	7.85638	---	---	8.48472	4.55859	7.8483	---	9.49123
MDL		0.077893	6.04306	0.00836549	0.019659	2.15693	0.0220568	n.c.	0.0817964	0.172035	0.0104253	0.133883	0.12111	0.359251	0.0335844	0.00661483	0.0330244	0.00174817	0.00834637	0.00839198	0.0621133	0.0089163	0.00167449	0.00161396	0.00650928	n.c.	0.000344175
17-9C spot7	collorm banded py-III	32.7827	212894	7.65493	317.62	410002	282.323	16.0928	232.685	2466.53	b.d.l.	b.d.l.	295.976	5.19057	273.523	92.2058	6.51485	b.d.l.	1.50533	2.11698	b.d.l.	0.396516	1.55725	5.60944	263.22	0.0611344	0.381425
RSD%		6.44704	3.60995	5.14824	3.26831	4.30892	2.34794	24.9764	3.11707	4.55968	---	---	4.39566	95.7633	4.61764	2.98873	23.6697	---	19.9136	14.9982	---	74.3837	26.1096	8.37079	5.96889	95.6587	8.40944
MDL		0.180189	15.6587	0.0203842	0.0518332	5.66202	0.0545864	0.600957	0.198522	0.404925	0.0221342	0.354461	0.305419	1.09733	0.0867141	0.0163936	0.0822336	0.00656275	0.0231655	0.0217448	0.298879	0.0860182	0.00291495	0.00400077	0.0166528	0.00843174	0.00089885
17-9C spot8	early fine grain py-I	7.55563	9520.99	4.74843	34.7675	537174	75.2073	1.83647	104.242	12743.7	0.644168	2.79037	148.709	b.d.l.	105.889	30.9197	5.17737	0.027327	4.79216	1.34541	b.d.l.	0.421559	2.27471	19.5099	133.921	0.0381825	0.0688771
RSD%		10.8194	17.7028	5.098	5.22158	4.38831	7.55885	90.1163	5.19564	5.29031	21.416	62.1411	3.67766	---	5.05793	3.32954	15.0646	98.0388	6.95527	12.8528	---	39.0043	9.75393	3.49296	5.94405	55.2358	13.6571
MDL		0.0689466	5.95493	0.00753557	0.0187501	2.11086	0.0216184	0.143612	0.0746357	0.163479	0.00825265	0.130275	0.111532	0.0368427	0.0302353	0.00616885	0.0306818	0.00324882	0.0081509	0.00778321	0.0485081	0.0229258	0.00153406	0.00152605	0.00558657	0.00480583	0.000356586
19-7-1 spot1	cpy	2.49021	189.724	0.483945	3.32106	265558	138.319	b.d.l.	375558	726.883	0.334603	b.d.l.	1.60413	270.029	1.08971	4.45446	6.24436	0.228778	10.6212	b.d.l.	17.1367	b.d.l.	0.0711623	b.d.l.	0.330633	0.169957	0.0795608
RSD%		51.1906	46.4708	30.8721	9.73504	4.51898	4.32276	---	3.88602	4.50641	47.5731	---	49.649	13.1218	58.7969	18.9824	17.4845	29.1237	5.42608	---	13.1879	---	54.4245	---	31.8917	20.375	25.1955
MDL		0.136271	5.08842	0.00975747	0.0297605	3.22213	0.0305459	0.308388	0.343424	0.119461	0.0189671	0.19237	0.117741	0.500581	0.096454	0.00966165	0.0609482	0.00628889	0.00891909	0.0883415	0.202249	0.00391053	0.00209367	n.c.	0.00352588	0.00746949	0.000297758
19-7-1 spot2	cv-dg	2.76856	b.d.l.	2.50795	2.46856	7957.87	0.893947	b.d.l.	628792	9.44207	0.577736	b.d.l.	b.d.l.	433.607	b.d.l.	27.2395	0.093629	0.0347817	3.897	0.119616	6.13397	b.d.l.	1.18909	b.d.l.	3.73187	0.0621251	0.0157648
RSD%		18.9255	---	14.2916	12.2812	9.30752	15.1711	---	1.72853	13.7745	17.8955	---	---	11.111	---	4.23148	93.7995	55.3394	5.98415	38.2232	14.3268	---	9.03406	---	7.93715	40.5727	28.5463
MDL		0.0478537	n.c.	0.00745295	0.0165415	1.23412	0.0128905	0.00259364	0.153285	0.0481937	0.00701696	0.0340737	n.c.	0.231123	n.c.	0.00460464	n.c.	0.00358123	0.00357229	0.0174949	0.0872712	0.00273837	0.000878643	n.c.	0.00197994	0.00252622	0.000171998
19-7-1 spot3	cv-dg	10.2396	b.d.l.	9.76823	3.58786	1873.22	0.226097	b.d.l.	753781	8.61493	0.287958	b.d.l.	1.18889	534.679	b.d.l.	31.8165	0.617255	0.747605	0.479175	0.0954138	2.18143	0.0765911	2.90683	0.00918738	7.87068	0.0408752	0.0138389
RSD%		7.98	---	6.74486	5.59117	6.91699	36.3459	---	1.72853	15.7018	27.2508	---	27.427	8.85372	---	5.31509	56.2451	69.1953	16.5317	34.7149	25.6226	43.9365	9.01437	62.6457	5.52393	37.787	23.6927
MDL		0.039594	0.650551	0.0034368	0.00923695	0.926158	0.00935372	0.00594416	0.108367	0.0316183	0.00466795	n.c.	0.0194276	0.151609	0.0915393	0.00331285	0.0176861	0.00176648	0.00261199	0.0102568	0.0520966	0.00467872	0.000670101	n.c.	0.00116984	0.00199512	8.82534e-05
19-7-1 spot4	cv-dg	b.d.l.	b.d.l.	b.d.l.	b.d.l.	14.1676	b.d.l.	b.d.l.	673945	2.99187	b.d.l.	b.d.l.	0.305402	b.d.l.	b.d.l.	4.81639	b.d.l.	b.d.l.	b.d.l.	b.d.l.	0.445796	b.d.l.	0.042577	b.d.l.	b.d.l.	b.d.l.	b.d.l.
RSD%		---	---	---	---	53.1096	---	---	1.72853	21.7831	---	---	78.1282	---	---	10.9076	---	---	---	---	91.7145	---	37.2977	---	---	---	---
MDL		0.0221688	0.642672	n.c.	0.016278	22.8074	0.0307368	n.c.	0.12088	0.0397217	n.c.	n.c.	0.045414	0.121531	n.c.	0.00289294	0.0131216	0.000456574	0.00230489	0.00210704	0.0306814	0.0029804	0.000536477	n.c.	0.00125398	n.c.	n.c.
19-7-1 spot5	cv-dg	0.885664	b.d.l.	b.d.l.	0.16874	b.d.l.	b.d.l.	b.d.l.	707663	1.35049	b.d.l.	b.d.l.	b.d.l.	b.d.l.	b.d.l.	3.8827	0.284441	b.d.l.	b.d.l.	b.d.l.	b.d.l.	0.0590071	0.0680811	b.d.l.	b.d.l.	b.d.l.	b.d.l.
RSD%		43.4102	---	---	62.4234	---	---	---	1.72853	38.3452	---	---	---	---	---	9.0406	82.6536	---	---	---	---	99.764	29.6636	---	---	---	---
MDL		0.716523	2.86012	0.00232542	0.0109089	n.c.	n.c.	n.c.	0.137775	0.0432593	0.00332475	n.c.	n.c.	n.c.	n.c.	0.00374354	0.0273937	n.c.	n.c.	0.00225783	0.159618	0.00379932	0.000666031	n.c.	0.000769639	0.0163871	n.c.
19-7-1 spot6	cpy, core	b.d.l.	138.219	0.113405	6.63008	275941	152.971	b.d.l.	361100	804.14	0.78774	1.7767	2.50503	522.712	b.d.l.	0.670944	2.96264	0.265812	23.0516	b.d.l.	46.2534	b.d.l.	b.d.l.	0.0236956	0.0491502	0.154899	0.0187451
RSD%		---	60.9516	85.8536	5.66828	4.4996	3.67654	---	2.76482	3.72565	24.2013	61.5631	29.7438	10.1564	---	22.5538	25.7857	22.9416	4.45114	---	7.03414	---	---	80.7133	78.4955	30.1606	37.0931
MDL		n.c.	11.9523	0.00910187	0.0285683	3.06528	0.0282703	0.172569	0.323848	0.112733	0.0139608	0.415982	0.0840499	0.481724	n.c.	0.00949547	0.0597532	0.00590757	0.00830588	0.00442023	0.17241	0.0437656	0.00174906	n.c.	0.00377639	0.00629703	0.000343677
19-7-1 spot7	cpy, rim, same grain as spot6	b.d.l.	b.d.l.	0.7862	6.27213	262140	134.941	b.d.l.	353411	803.448	b.d.l.	b.d.l.	b.d.l.	349.053	b.d.l.	0.708553	2.67218	0.201666	15.4636	b.d.l.	19.3657	b.d.l.	b.d.l.	0.0215385	0.342598	b.d.l.	0.0405958
RSD%		---	---	18.3336	7.81154	5.06686	3.92925	---	3.17556	3.60863	---	---	---	11.5018	---	25.9033	29.3771	29.8052	5.0153	---	11.4757	---	---	94.8609	22.7254	---	21.5124
MDL		n.c.	n.c.	0.0136529	0.0321685	3.41682	0.0309897	0.215459	0.359918	0.125298	n.c.	n.c.	n.c.	0.537848	n.c.	0.0144966	0.0694897	0.00529993	0.00937139	0.00428249	0.200187	n.c.	n.c.	n.c.	0.00500963	0.00574484	0.000385959
19-7-1 spot8	cv-dg	2.19565	b.d.l.	b.d.l.	7.03827	28013	0.404822	b.d.l.	639900	31.2426	0.49472	b.d.l.	b.d.l.	271.682	b.d.l.	22.5075	0.474888	0.10871	11.2384	b.d.l.	9.62311	b.d.l.	0.149987	0.0366376	1.64711	0.452069	b.d.l.
RSD%		21.0636	---	---	7.43496	10.1758	71.4182	---	1.72853	17.3289	21.0093	---	---	9.6845	---	4.73821	36.9537	22.7644	4.59221	---	13.2831	---	27.2591	50.6409	11.1717	12.8244	---
MDL		0.0583342	n.c.	n.c.	0.0126414	1.1828	0.00536417	0.0713182	0.165226	0.0362413	0.0069292	0.0490134	0.0186813	0.217504	0.110499	0.00512936	0.0751549	0.00271223	0.00384375	n.c.	0.084285	0.000290328	0.000810113	n.c.	0.00144369	0.00183714	n.c.
19-7-1B spot1	bn-dg	2.78964	51.5378	0.0536094	4.29797	32560.7	0.497129	b.d.l.	697425	11.5136	0.376127	b.d.l.	b.d.l.	185.488	b.d.l.	27.1243	b.d.l.	0.0894772	31.4564	b.d.l.	12.9345	b.d.l.	0.170294	b.d.l.	0.432197	0.0212092	b.d.l.
RSD%		19.4892	86.364	98.8032	6.86659	5.60211	26.2588	---	1.24391	12.197	21.1864	---	---	18.4094	---	4.18456	---	22.8175	5.92193	---	8.28119	---	15.8899	---	16.3043	89.1516	---
MDL		0.0494689	4.26186	0.00747327	0.015165	1.65901	0.0193181	0.103053	0.117863	0.123142	0.00816304	0.0704836	n.c.	0.157645	n.c.	0.00488651	n.c.	0.00261312	0.00498157	n.c.	0.0603192	0.00521083	0.00153444	n.c.	0.00251349	0.000719607	n.c.
19-7-1B spot2	bn-dg	2.83809	69.397	b.d.l.	2.26746	22189.8	0.196329	b.d.l.	724377	20.815	0.532361	1.71293	b.d.l.	331.931	b.d.l.	25.4516	b.d.l.	0.109263	29.4794	0.0858528	29.4068	b.d.l.	0.13514	0.0125721	2.01318	0.0679227	b.d.l.
RSD%		18.3162	41.6541	---	7.18284	8.81713	56.2477	---	1.4085	10.4364	18.6578	42.1529	---	19.391	---	4.65039	---	19.8894	5.4478	55.9802	4.45884	---	23.9274	48.8286	23.1257	38.7275	---
MDL		0.0411262	9.57076	9.09316e-05	0.013237	1.17431	0.0093533	0.182474	0.0947767	0.0782937	0.00788515	0.129348	n.c.	0.125954	0.00692469	0.00435203	0.0043138	0.00240607	0.00510986	0.00571006	0.0641939	0.00137154	0.000876283	0.000928696	0.00146222	0.00087522	4.60086e-05
19-7-1B spot3	cv-dg	0.675458	47.7383	0.03217	0.286762	121.151	b.d.l.	b.d.l.	757184	5.46711	0.0538765	0.798246	b.d.l.	b.d.l.	b.d.l.	7.58406	b.d.l.	b.d.l.	0.0641873	0.0788567	b.d.l.	b.d.l.	b.d.l.	0.0105579	b.d.l.	b.d.l.	b.d.l.
RSD%		60.0372	59.3321	88.2295	47.7707	16.1989	---	---	1.4085	11.1581	71.0475	71.5591	---	---	---	9.04701	---	---	45.7474	41.6268	---	---	---	44.5725	---	---	---
MDL		0.0160991	5.75437	0.00249425	0.00536934	0.816168	0.00265377	0.0681577	0.00252393	0.0799168	0.00554877	0.058398	0.0261314	0.0581906	0.00360234	0.00269777	0.960175	n.c.	0.00394429	0.00565997	n.c.	n.c.	0.000289399	0.00080704	0.00153396	0.00146219	3.73278e-05
19-7-1B spot4	cv-dg	b.d.l.	b.d.l.	0.0434504	0.44479	15.3264	b.d.l.	b.d.l.	743288	2.90254	0.0577726	b.d.l.	b.d.l.	1.70094	b.d.l.	5.40424	0.184166	b.d.l.	0.0465429	b.d.l.	b.d.l.	b.d.l.	0.0292437	b.d.l.	b.d.l.	b.d.l.	0.00240819
RSD%		---	---	82.5191	27.0169	65.4388	---	---	1.4085	22.5355	87.6058	---	---	60.3592	---	14.7215	54.3126	---	48.1874	---	---	---	56.1267	---	---	---	58.6612
MDL		0.0139743	2.50205	0.00564013	0.00838056	0.745085	0.00870211	n.c.	0.0248268	0.0762021	0.00454441	0.0669404	0.107159	0.39936	0.0288723	0.00240487	0.0196304	0.000421016	0.0147209	0.005006	n.c.	0.0165245	0.00064967	n.c.	0.00139867	0.00076864	6.90646e-05
19-7-1B spot5	bn-dg	b.d.l.	b.d.l.	b.d.l.	6.31672	31200.5	0.532277	b.d.l.	674146	28.6329	0.12468	b.d.l.	1.31056	132.302	0.262773	24.4875	0.492226	0.0294833	9.31859	b.d.l.	7.20708	b.d.l.	0.211796	0.00754318	1.79006	0.0298935	b.d.l.
RSD%		---	---	---	6.53931	5.79566	26.5739	---	1.24391	8.40748	54.5763	---	55.4583	19.2399	57.9933	5.97396	58.662	54.5758	6.09608	---	9.96277	---	17.9519	93.9195	25.1635	62.9254	---
MDL		0.0262151	n.c.	n.c.	0.0149781	1.50626	0.0141069	n.c.	0.111726	0.0958326	0.00696808	n.c.	0.070019	0.148444	0.626557	0.0045027	0.0152126	0.00264986	0.0047798	0.00391446	0.0747727	0.0125871	0.00125099	0.000615557	0.0017564	0.00105296	n.c.
19-7-1B spot6	bn-dg	13.3107	b.d.l.	15.3105	20.2041	41208.9	1.23931	b.d.l.	701977	29864.3	1.33649	1.70385	16.5246	2503.91	3.8216	44.3747	8.78047	0.0264917	6.20985	1.13835	10.1366	b.d.l.	1.06003	0.0769275	119.492	5.07462	0.135486
RSD%		14.6608	---	12.9033	13.5507	7.09323	54.5847	---	1.24391	31.6823	20.5865	45.7393	18.0454	22.6829	19.8772	5.52955	27.5222	65.4479	7.50484	21.7004	11.6462	---	16.5566	36.386	14.5335	22.0153	31.8655
MDL		0.0421955	n.c.	0.00537551	0.0106532	1.36133	0.00927188	n.c.	0.101241	0.0530354	0.00461894	0.114521	0.0522386	0.119279	0.017349	0.00408003	0.0118991	0.00263126	0.00431075	0.00435637	0.0529792	0.00250695	0.000879067	0.000250366	0.00201743	0.000887306	6.74235e-05
19-7-1B spot7	cv	6.0446	b.d.l.	4.91301	9.95319	10719.7	0.428215	1.47506	711595	24719.3	0.810037	b.d.l.	9.53724	763.492	1.23313	11.5822	5.94615	b.d.l.	1.47682	0.529961	3.10542	b.d.l.	0.238717	b.d.l.	50.8089	1.64956	0.0593799
RSD%		23.8031	---	28.8226	27.5523	24.9632	34.2011	62.1385	1.24391	31.3249	26.11	---	25.9371	32.255	27.9927	21.2191	31.0103	---	26.094	33.2268	34.9581	---	31.7815	---	29.4939	34.9614	25.0057
MDL		0.0219673	0.0760519	0.00242524	0.0062112	0.663265	0.00742976	0.287368	0.0854968	0.0384382	0.00334079	0.0282827	0.0315321	0.0639407	0.0100064	0.00207798	0.00809704	0.000421551	0.00221571	0.00246413	0.0237609	0.0040075	0.000467235	9.69149e-05	0.00106993	0.00048323	5.91608e-05
19-7-1B spot8	bn-dg	24.5495	b.d.l.	5.14822	26.6118	113336	0.217144	b.d.l.	636200	5461.6	0.33247	0.670166	59.1321	267.429	2.18417	59.8822	2.80555	0.127919	15.7579	3.74864	15.0273	0.161999	0.323777	0.0805611	34.2899	0.951225	0.0279492
RSD%		6.88323	---	7.3281	5.89768	6.83506	49.3478	---	1.24391	7.54659	23.2668	74.186	7.61184	17.726	11.6961	5.24554	16.2428	21.0319	8.6475	6.71528	6.17714	71.5296	16.497	28.102	4.67551	8.0332	18.2216
MDL		0.040629	n.c.	0.00466811	0.0131224	1.28037	0.0165362	0.267895	0.0882808	0.0781325	0.00581159	n.c.	0.0582171	0.128477	0.0195509	0.00366476	0.0167094	0.00217023	0.0045069	0.00494262	0.0500583	0.00695975	0.000835428	0.000296189	0.00223177	0.00106874	9.19763e-05
17-7-3 spot1	cpy	b.d.l.	119.449	b.d.l.	0.448611	300967	76.1789	3.07789	365593	35.4105	b.d.l.	1.47981	b.d.l.	117.84	b.d.l.	b.d.l.	1.95026	0.352942	6.10805	b.d.l.	2.68229	b.d.l.	0.0700988	b.d.l.	b.d.l.	0.678938	b.d.l.
RSD%		---	70.6958	---	60.6438	4.63126	3.26052	47.643	2.18841	10.1893	---	99.9141	---	14.3808	---	---	39.208	18.7703	9.77043	---	63.7812	---	42.1995	---	---	14.1372	---
MDL		0.0334349	4.37201	0.00656628	0.0203227	3.1718	0.0311957	0.59787	0.133432	0.120623	0.0113149	0.128705	0.0519387	0.337675	0.0523063	0.00851396	0.0496864	0.00403561	0.00917971	n.c.	0.131123	0.0217117	0.00316784	0.000811777	n.c.	0.00391337	n.c.
17-7-3 spot2	early fine grain py-I	9.48779	b.d.l.	0.267974	0.841098	550628	1718.52	429.215	484.301	39.3493	b.d.l.	b.d.l.	b.d.l.	198.397	0.606937	0.316679	0.479641	0.0153498	b.d.l.	b.d.l.	20.0999	b.d.l.	b.d.l.	0.407941	3.1815	4.39734	0.0199976
RSD%		16.4049	---	19.782	20.1964	9.95166	8.49402	9.90326	25.7751	13.9607	---	---	---	11.9883	48.4874	27.3288	61.9344	80.8464	---	---	10.2135	---	---	18.1701	11.2007	6.95372	28.1787
MDL		0.0492473	1.24251	0.00476813	0.0101237	1.17315	0.0114058	0.06847	0.040807	0.0426561	0.000510779	0.0319277	0.0145402	0.120575	0.0316067	0.00365447	0.0160992	0.00346329	0.00276957	n.c.	0.0609975	0.0789392	n.c.	0.000443698	0.00142381	0.001415	0.000102437
17-7-3 spot3	cpy	3.44484	b.d.l.	b.d.l.	1.01747	306765	32.1826	2.54158	349662	86.2641	b.d.l.	b.d.l.	b.d.l.	157.767	1.41753	1.34498	1.0238	0.475273	10.0703	0.119716	2.80988	0.195369	b.d.l.	b.d.l.	0.327568	0.385245	0.0125848
RSD%		43.4456	---	---	28.2206	4.30872	3.40163	63.0284	2.0851	6.52927	---	---	---	10.8079	38.3727	19.2954	47.9293	15.8358	8.73483	70.4066	41.7667	75.8024	---	---	27.1442	24.0304	35.191
MDL		0.137694	4.33764	n.c.	0.0322789	3.39652	0.0330536	0.157821	0.138717	0.140996	0.00917202	0.532499	0.099844	0.345797	0.173582	0.0100228	0.0661885	0.00459118	0.00997895	0.194005	0.299282	0.036155	n.c.	0.00321746	0.00396577	0.00377335	0.000424303
17-7-3 spot4	py-I rim	288.855	365.669	b.d.l.	1.08198	558738	134.86	8.67444	23.3046	1.04045	b.d.l.	1.65004	1.1752	51.9661	b.d.l.	b.d.l.	b.d.l.	0.0328934	b.d.l.	b.d.l.	27.2499	0.142063	b.d.l.	b.d.l.	1.30165	34.4239	b.d.l.
RSD%		11.0727	17.0279	---	16.51	9.1506	8.97288	15.1153	15.6917	53.2636	---	45.6278	49.5209	15.266	---	---	---	45.6624	---	---	8.77851	58.3363	---	---	12.4177	8.07262	---
MDL		0.0607867	3.84163	0.00204332	0.0117851	1.346	0.0151956	0.0867272	0.0810916	0.0763435	0.00312353	0.0670881	0.024434	0.132842	0.0102282	0.0156258	0.0105301	0.00330318	0.0194459	n.c.	0.0765343	0.0264108	n.c.	n.c.	0.00197864	0.00184253	n.c.
17-7-3 spot5	py-I core	8.33294	40.8179	0.0948813	0.482215	616372	125.43	26.5799	404.86	1.93966	b.d.l.	b.d.l.	2.06433	136.589	0.415517	0.115437	0.403898	b.d.l.	b.d.l.	0.0808197	14.1323	b.d.l.	b.d.l.	b.d.l.	0.668059	4.88179	b.d.l.
RSD%		13.9095	86.3729	40.8165	28.4059	3.34214	10.8038	13.2789	69.1078	51.0211	---	---	23.1459	14.2472	60.8	29.2189	52.8273	---	---	57.2857	9.61355	---	---	---	12.7601	8.98	---
MDL		0.0474018	3.47163	n.c.	0.0090423	1.57914	0.0128968	0.0674248	0.0212367	0.0292854	0.165698	0.0270053	0.0306072	0.115742	0.0733309	0.00454472	0.0312021	0.00159	0.0341751	0.00502031	0.0674244	0.0203568	0.000529677	n.c.	0.0016452	0.00141202	n.c.
17-7-3 spot6	cpy	1.26899	112.802	0.137996	b.d.l.	282826	41.0226	b.d.l.	370847	47.3934	0.340344	b.d.l.	1.0741	226.854	b.d.l.	1.50322	b.d.l.	0.542746	6.86338	b.d.l.	b.d.l.	b.d.l.	b.d.l.	b.d.l.	0.0350028	0.33374	b.d.l.
RSD%		83.4373	75.9451	82.6836	---	4.7101	2.69714	---	2.23903	7.96917	32.5079	---	74.5534	10.507	---	19.4983	---	12.2028	8.11123	---	---	---	---	---	93.8276	20.1063	---
MDL		n.c.	18.9957	0.00745951	n.c.	3.38651	0.0335371	0.499645	0.140793	0.13567	0.0288357	0.113824	0.100481	0.378906	0.0644943	0.00906753	n.c.	0.00488861	0.00981409	0.00855341	0.102486	0.0159371	0.00585583	0.00675456	0.0141045	0.00443101	n.c.
17-7-3 spot7	early fine grain py-I	881.766	1288.45	0.245906	3.38327	565271	150.289	6.54314	67.3894	4.91871	b.d.l.	b.d.l.	0.918041	24.9919	b.d.l.	b.d.l.	1.04916	b.d.l.	b.d.l.	b.d.l.	46.0772	b.d.l.	b.d.l.	b.d.l.	2.53973	77.3181	0.00731676
RSD%		6.98541	8.80562	23.5544	6.5336	6.72933	11.7258	17.3483	7.37373	30.2766	---	---	36.0875	18.3722	---	---	23.746	---	---	---	6.31629	---	---	---	14.3174	5.35328	34.149
MDL		0.0561944	4.33807	0.00541061	0.013768	1.5135	0.0146946	0.0891913	0.0644072	0.0519048	n.c.	0.0380074	0.0693545	0.157449	n.c.	0.125791	0.0355037	0.00509864	0.00766586	0.0143517	0.0797309	n.c.	0.00152454	0.000548217	0.00178736	0.00175675	0.000152406
17-7-3 spot8	early fine grain py-I	1147.53	929.498	1.42512	22.0899	600492	418.699	2.63514	284.982	52.0386	b.d.l.	b.d.l.	5.79385	131.263	2.1939	0.0787867	0.941077	0.0188895	0.139048	0.100534	10.1325	b.d.l.	0.0286893	0.110948	8.60908	123.659	0.0971225
RSD%		6.19488	6.11287	10.6181	11.8986	7.52959	9.89815	38.3158	10.1733	9.90294	---	---	9.97333	10.3445	15.4048	58.5641	28.8034	89.4494	46.9728	42.7511	9.67302	---	38.8969	21.9773	6.32563	5.00456	13.3746
MDL		0.0540546	4.26206	0.00492157	0.0114577	1.38657	0.0145833	0.0613008	0.0558683	0.0495788	0.00510083	n.c.	0.0332074	0.148796	0.0333795	0.00405092	0.0236092	0.00309172	0.00368765	0.00658965	0.0831352	0.00637149	0.00183627	0.000615946	0.00170897	0.00160385	0.000141834
17-7-1D spot1	cpy	15.3686	111.724	b.d.l.	11.3487	342757	470.988	b.d.l.	298152	1647.76	b.d.l.	2.47002	b.d.l.	1211	1.06255	0.651502	9.23648	4.89142	7.65451	b.d.l.	101.773	b.d.l.	b.d.l.	b.d.l.	0.949531	5.54189	b.d.l.
RSD%		74.3928	80.9379	---	5.16097	4.56559	3.72067	---	3.18694	3.86146	---	80.6562	---	10.3499	79.9065	30.006	19.7225	10.6654	7.38267	---	6.13785	---	---	---	21.53	25.9635	---
MDL		0.122661	5.63293	0.00706711	0.0340566	3.48207	0.0352574	n.c.	0.420513	0.135268	0.00364791	0.119977	0.408179	0.356062	n.c.	0.0111762	0.0511738	0.00534915	0.0102677	0.0178544	0.173168	0.0238678	0.000445972	0.00161601	0.00564454	0.00279831	n.c.
17-7-1D spot2	bn	120.616	63.866	0.58376	30.2798	178379	1672.66	74.8714	550901	77.2079	0.263119	2.83873	46.855	174.996	38.4518	71.162	0.58518	11.331	1.70527	0.705947	31.2014	0.120732	1.32211	11.0641	36.4079	9.39794	0.874184
RSD%		7.11074	43.5746	11.2452	6.07752	4.97696	5.03892	7.05465	1.89305	12.0023	27.7083	28.2861	6.50723	11.637	6.18363	5.35964	49.6895	10.6385	11.2604	11.1244	6.20972	53.491	13.5257	5.44028	4.64262	6.32098	4.76369
MDL		0.0463741	1.92298	0.00486473	0.0138242	1.46994	0.0149519	0.0928301	0.165082	0.0353916	0.00844573	0.0660488	0.0325899	0.124043	0.05	0.0056396	0.0153285	0.0023386	0.00353725	0.00526988	0.0689138	0.00880466	0.000537614	0.000701306	0.0023415	0.00117166	0.000321911
17-7-1D spot3	dg-cv	214.628	520.059	0.117582	0.735553	322.314	0.987755	b.d.l.	766598	37.1767	0.449268	b.d.l.	b.d.l.	b.d.l.	b.d.l.	25.1153	1.87066	0.217794	b.d.l.	b.d.l.	1.29491	0.418953	0.148599	0.129303	0.458603	0.0495146	0.0177987
RSD%		7.40668	13.991	51.6433	22.5609	7.93049	21.4081	---	1.89305	8.46241	99.8347	---	---	---	---	3.11494	27.2692	21.5707	---	---	63.162	38.0997	28.2321	22.1968	19.4211	51.6264	29.2667
MDL		0.0796389	5.27323	0.00840229	0.0236605	2.3201	0.0184993	0.0964973	0.266452	0.0783002	0.00911958	0.0903521	n.c.	0.042047	0.114883	0.00846746	0.0331435	0.00323122	0.00236717	n.c.	0.137337	0.0126408	0.000749509	0.0012822	0.00332817	0.00151013	0.00044879
17-7-1D spot4	cpy	b.d.l.	275.4	0.339112	14.7523	343602	471.993	3.35019	290552	1743.59	0.361991	b.d.l.	b.d.l.	1285.46	b.d.l.	11.2049	6.38354	9.46494	6.69822	b.d.l.	110.322	b.d.l.	b.d.l.	b.d.l.	b.d.l.	1.98929	b.d.l.
RSD%		---	43.2224	50.2781	5.59029	4.76877	2.63354	72.2572	3.38882	3.70679	66.3019	---	---	11.2786	---	4.83917	22.9726	9.39504	11.1648	---	4.5614	---	---	---	---	10.7896	---
MDL		0.17298	12.6521	0.0173682	0.0428269	4.43365	0.0453239	0.292027	0.533339	0.175141	0.0466164	0.331648	n.c.	0.447627	n.c.	0.0169991	0.0706924	0.00712053	0.0115888	0.117274	0.216895	0.0175926	n.c.	n.c.	0.0168601	0.00334096	n.c.
17-7-1D spot5	cpy	197.357	124.309	0.496131	36.073	237937	1560.58	83.9002	403772	564.8	b.d.l.	4.76305	50.7477	140.624	18.3037	47.9151	0.95498	12.2098	1.22774	0.784853	25.1143	b.d.l.	2.28147	11.7835	20.0599	1.15372	1.25501
RSD%		2.56455	39.6515	16.0739	3.87837	4.46838	3.53156	5.35811	3.67337	4.21102	---	23.3624	4.78528	10.9184	7.10092	3.47998	35.79	9.51777	10.6014	11.7459	6.34828	---	11.1877	3.82618	4.25143	10.6697	3.55899
MDL		0.0760021	6.50683	0.00684302	0.0173132	1.88295	0.0187456	0.108297	0.221293	0.0703582	0.00461163	0.0945117	0.0398277	0.196771	0.0572342	0.00728127	0.021905	0.00296676	0.00487813	0.00695726	0.0854467	n.c.	0.000696177	0.000880404	0.00293615	0.00121709	0.000439199
17-7-1D spot6	bn	30.5867	48.3143	0.526866	25.2948	141295	1253.93	60.8172	558498	31.2458	b.d.l.	8.85602	50.312	160.546	24.1313	64.5333	0.227842	6.68013	1.33743	0.582664	34.0225	b.d.l.	1.69911	14.7095	21.0808	2.47438	0.503112
RSD%		6.45727	61.3835	14.0908	4.77424	6.69221	4.97553	6.63331	1.89305	7.44022	---	18.8196	7.61793	14.1267	6.39684	4.23484	74.9601	10.1409	13.7479	12.1301	8.38923	---	11.2429	5.55725	6.74674	12.1048	5.54469
MDL		0.0494681	14.5651	0.00472452	0.0127357	1.24023	0.0126963	0.0768507	0.166514	0.0492949	n.c.	0.063655	0.0258328	0.113929	0.0401111	0.00495947	0.0217776	0.001975	0.00329058	0.00492049	0.0575911	0.00312425	0.000474092	0.000598517	0.0019314	0.00087102	0.000276485
17-7-1D spot7	cpy, mixed with bn	46.2066	b.d.l.	1.54205	31.2298	210592	1667.56	103.271	454076	1660.47	b.d.l.	5.96952	46.1331	168.047	23.5827	67.0356	0.667011	4.24862	3.36324	2.33552	20.9447	b.d.l.	3.47613	19.0479	28.8856	1.1135	1.20636
RSD%		6.86969	---	6.27037	4.67576	5.40214	4.16961	4.5209	1.89305	4.59416	---	18.0946	5.23324	11.0689	5.33812	3.80627	38.1714	10.3389	6.69293	6.73497	7.24334	---	10.167	3.67002	4.34887	9.64538	4.5953
MDL		0.0464593	3.02886	0.00532836	0.0130501	1.34453	0.0139456	0.0862969	0.172121	0.0517102	n.c.	0.0756411	0.028807	0.127887	0.0430287	0.0054985	0.017038	0.00232725	0.00417701	0.00543907	0.0632777	0.00540723	0.000535055	0.00066759	0.00233503	0.00118877	0.000291342
17-7-1D spot8	cpy, mixed with bn	44.6898	101.1	0.396666	32.3999	234066	1784.87	70.502	407773	440.681	0.167227	0.869969	35.2267	61.6023	18.3992	61.5142	0.477298	7.5902	4.74421	0.866575	14.5085	0.146295	1.89321	11.0066	20.7955	2.76267	1.32163
RSD%		6.14984	38.2734	15.4995	6.04829	5.19118	4.34438	5.41115	5.58858	16.6225	32.2688	81.3094	6.71773	13.706	7.84465	4.86156	46.904	9.54032	13.1696	12.0277	7.85478	67.9062	12.2013	4.8211	3.39284	5.95879	5.31885
MDL		0.0602681	5.29009	0.00588214	0.0148578	1.58605	0.0162203	0.097357	0.190667	0.0486518	0.0128214	0.0937642	0.0356014	0.160616	0.0488782	0.00636674	0.0326763	0.00245088	0.00481438	0.00680814	0.0720931	0.0146215	0.000580487	0.000795136	0.00253684	0.00120611	0.000349535
19-6-1 spot1	cpy	b.d.l.	299.286	0.241872	5.2817	298138	117.845	b.d.l.	370379	543.096	4.12191	6.95311	b.d.l.	141.644	b.d.l.	2.50172	4.67296	0.840546	15.0229	b.d.l.	12.9163	b.d.l.	b.d.l.	b.d.l.	0.0710513	0.119672	0.00688154
RSD%		---	31.1942	48.0468	8.12734	5.47069	3.83108	---	2.75332	4.74618	10.3117	29.7009	---	12.4199	---	14.6196	19.7846	13.0072	9.07243	---	15.8143	---	---	---	67.9151	33.1326	53.7028
MDL		0.0413184	19.6183	n.c.	0.0572178	3.72983	0.0355861	0.0994407	0.232657	0.20775	0.0143033	0.215824	0.0261848	0.468485	0.119575	0.0124967	0.05463	0.00501639	0.0189467	n.c.	0.205933	0.0173537	0.00359345	n.c.	n.c.	0.00452008	0.00195462
19-6-1 spot2	cpy	b.d.l.	b.d.l.	b.d.l.	3.90833	304397	112.9	b.d.l.	383342	569.349	0.73979	1.9792	b.d.l.	440.404	b.d.l.	8.82859	6.85582	1.37469	27.9397	b.d.l.	43.4439	0.119944	0.0987028	b.d.l.	b.d.l.	0.231305	b.d.l.
RSD%		---	---	---	18.8975	5.26792	2.67803	---	2.72185	4.3944	25.2889	70.2283	---	9.26154	---	11.3021	16.7663	9.66206	8.67247	---	8.42433	87.7138	46.0355	---	---	25.7442	---
MDL		n.c.	n.c.	n.c.	0.0233191	3.24378	0.0314365	0.014762	0.205454	0.183589	0.0133859	1.7389	n.c.	0.405475	0.0117034	0.0112656	0.0444487	0.00470062	0.0166863	1.58213	0.169227	0.065661	0.00275803	n.c.	0.0203234	0.00305657	0.000474821
19-6-1 spot3	cpy	b.d.l.	143.667	b.d.l.	4.3283	279143	113.091	105.922	393090	597.462	32.0285	94.3859	b.d.l.	283.892	b.d.l.	4.64695	4.3065	1.00518	4.44564	b.d.l.	22.326	b.d.l.	0.180111	b.d.l.	3.45838	26.3865	b.d.l.
RSD%		---	66.368	---	51.1259	4.42632	3.80801	63.3772	2.59981	4.58581	5.54411	6.42891	---	9.93217	---	13.5162	30.2688	8.66229	39.5563	---	15.1115	---	27.106	---	22.989	5.39746	---
MDL		0.407292	14.3235	n.c.	0.0278333	3.83392	0.0361118	0.326796	0.242331	0.214685	0.0152959	0.198426	0.0311381	0.478038	0.156242	0.012526	0.0414569	0.00547514	0.0150463	n.c.	0.176983	n.c.	0.00429597	n.c.	0.0152339	0.0037579	n.c.
19-6-1 spot4	cpy	1.61379	209.876	0.191768	16.8775	300886	115.299	b.d.l.	381131	565.559	9.25478	243.807	b.d.l.	84.1727	1.3782	6.17131	5.76094	1.03607	11.0508	b.d.l.	9.20792	0.332573	b.d.l.	b.d.l.	b.d.l.	1.97656	b.d.l.
RSD%		74.9152	51.8175	62.5059	15.2275	6.26194	2.89517	---	3.26476	5.00632	8.05694	5.41116	---	13.4974	59.662	13.2446	19.6935	9.175	12.1198	---	23.6186	87.7981	---	---	---	15.4104	---
MDL		0.216531	10.6239	n.c.	0.03868	3.44882	0.0325541	0.0222549	0.214059	0.185382	0.0150258	0.167905	0.197254	0.434572	0.158803	0.010585	0.0420711	0.0049996	0.0154319	0.0455983	0.162562	0.0152864	0.00624795	n.c.	0.00509807	0.00399979	0.000453719
19-6-1 spot5	bn-dg	44.6873	b.d.l.	0.268056	7.68201	73669.7	19.3877	7.32339	672169	192.954	0.575356	b.d.l.	1.25258	113.072	74.568	85.684	8.42366	1.2202	6.1759	0.799191	19.0499	0.548928	0.33711	0.170123	10.2509	105.12	0.107021
RSD%		4.346	---	57.5183	6.09688	7.72829	9.71965	78.077	1.36902	7.48803	27.9779	---	66.0461	15.4246	7.81157	10.7312	14.9178	7.67896	10.9058	25.8395	12.5736	37.4781	22.5115	23.2162	4.53788	3.74653	16.8811
MDL		0.145182	2.55248	n.c.	0.0551475	3.27232	0.0291876	n.c.	0.251438	0.184145	0.0185761	0.172029	0.166388	0.463729	0.115666	0.012978	0.0577029	0.00544887	0.0191512	0.0205639	0.198442	0.0231445	0.00300834	0.00214701	0.0216921	0.00389934	0.000777676
19-6-1 spot6	bn-dg	36.1514	262.61	0.828	8.33164	84362.3	20.4447	b.d.l.	622084	176.59	0.838993	b.d.l.	1.46178	93.5049	54.531	78.6991	3.53567	1.14557	9.85107	0.86974	21.9183	0.339537	0.832498	0.232189	15.9218	191.068	0.153783
RSD%		6.62379	39.9244	24.5084	9.0093	8.88676	9.55021	---	1.36902	6.70748	32.4754	---	75.9092	13.6591	5.8325	11.52	20.1347	9.26413	11.1932	24.1349	10.1697	83.486	15.8606	24.3524	5.11311	3.97054	11.9766
MDL		0.16835	17.8138	0.105024	0.058321	4.32465	0.0408388	n.c.	0.309844	0.246058	0.0172568	0.28814	0.181642	0.668471	0.149634	0.0152876	0.0897784	0.00741721	0.0237746	0.0260524	0.308287	0.0178543	0.00422528	0.00265482	0.0259567	0.00459817	0.000847709
19-6-1 spot7	bn	15.2552	b.d.l.	0.4129	8.06957	139278	46.8141	3.99048	503832	353.056	0.741384	b.d.l.	b.d.l.	70.4788	37.0735	54.8083	9.02923	0.884739	9.23904	b.d.l.	17.6561	b.d.l.	0.468653	b.d.l.	11.3691	158.758	0.0893565
RSD%		78.0024	---	68.0706	45.1194	5.7414	5.43686	68.9776	28.0259	6.17458	58.1227	---	---	34.711	29.2393	50.2608	21.4107	32.6284	29.0976	---	28.3331	---	48.5416	---	28.7817	17.2664	78.2459
MDL		0.0764578	5.46853	n.c.	0.0406221	7.54764	0.0738558	n.c.	0.249474	0.408261	0.0306286	1.85131	0.0800535	0.503856	0.124597	0.00992127	0.0873303	0.00564471	0.0225868	0.0154128	0.256667	0.00865988	0.00309977	0.000463513	0.0224075	0.00486835	0.000438073
19-6-1 spot8	cpy	2.58702	350.26	b.d.l.	4.52561	288036	122.618	b.d.l.	417683	562.576	0.707174	b.d.l.	b.d.l.	316.193	b.d.l.	5.34557	3.36231	1.04744	8.00136	b.d.l.	23.7025	b.d.l.	b.d.l.	b.d.l.	b.d.l.	1.35868	b.d.l.
RSD%		79.2608	27.7777	---	10.7617	5.09839	4.17371	---	3.1919	4.19667	25.0922	---	---	10.7146	---	12.8898	25.5605	8.74886	8.90699	---	11.3288	---	---	---	---	13.3257	---
MDL		0.135809	23.1372	0.00132514	0.0507412	3.69157	0.0360097	n.c.	0.240695	0.209316	0.0141208	0.064197	0.0771899	0.451817	n.c.	0.012881	0.0503361	0.00546232	0.0194602	n.c.	0.222219	0.0882884	n.c.	n.c.	n.c.	0.00330172	n.c.
Minimum Detection Limits
MDL = 3 * √(total background sample interval) / net counts per second(sample) * concentration(sample)
n.c.: not calculable (no counts during sample interval)
